# Supplementary material for: Vegetation restoration improved aggregation stability and aggregated-associated carbon preservation in the karst areas of Guizhou Province, southwest China
Source: PeerJ. 2024 Jan 22;12:e16699. doi: 10.7717/peerj.16699 (PMC10809982; doi:10.7717/peerj.16699)
Supplement: Supplemental Information 1 — Soil carbon content and macro aggregate content were higher than that of farm land. These data were used for statistical analysis to compare the differences between different vegetation. [file peerj-12-16699-s001.xlsx]

## Sheet: Aggregate size distribution
		Aggregate size distribution(%)
soil layer/cm	Vegetation restoration types	>2mm	2-0.25mm	<0.25mm
0-5cm	Garden plot	22.9046	53.551	23.5444
0-5cm	Garden plot	24.7814	45.0896	30.129
0-5cm	Garden plot	24.02	48.26	27.72
0-5cm	Grassland	40.3734	35.9636	23.663
0-5cm	Grassland	30.7972	44.029	25.1738
0-5cm	Grassland	32.822	40.4394	26.7386
0-5cm	Farmland	2.518	26.13	71.352
0-5cm	Farmland	1.9298	21.4882	76.582
0-5cm	Farmland	1.9234	27.6916	70.385
0-5cm	Shrubland	35.4076	28.462	36.1304
0-5cm	Shrubland	51.8542	29.7692	18.3766
0-5cm	Shrubland	23.9356	46.8548	29.2096
0-5cm	Woodland	33.4028	44.508	22.0892
0-5cm	Woodland	37.3088	42.722	19.9692
0-5cm	Woodland	34.1408	44.7698	21.0894
5-10cm	Garden plot	23.5404	44.8058	31.6538
5-10cm	Garden plot	23.487	39.6362	36.8768
5-10cm	Garden plot	16.92	48.76	34.32
5-10cm	Grassland	33.6068	42.2222	24.171
5-10cm	Grassland	24.6342	51.1282	24.2376
5-10cm	Grassland	27.9636	45.7604	26.276
5-10cm	Farmland	1.3344	24.0616	74.604
5-10cm	Farmland	1.8152	13.9326	84.2522
5-10cm	Farmland	1.9328	33.5192	64.548
5-10cm	Shrubland	24.9162	48.8046	26.2792
5-10cm	Shrubland	23.3718	53.2528	23.3754
5-10cm	Shrubland	31.2714	42.0366	26.692
5-10cm	Woodland	24.7762	49.235	25.9888
5-10cm	Woodland	17.3144	57.5178	25.1678
5-10cm	Woodland	18.3584	46.5852	35.0564
10-20cm	Garden plot	19.5854	41.6752	38.7394
10-20cm	Garden plot	28.9	47.4452	23.6548
10-20cm	Garden plot	15.7732	44.7218	39.505
10-20cm	Grassland	40.438	42.9976	16.5644
10-20cm	Grassland	30.6508	47.3132	22.036
10-20cm	Grassland	30.377	44.6556	24.9674
10-20cm	Farmland	0.5416	30.7908	68.6676
10-20cm	Farmland	0.4546	20.881	78.6644
10-20cm	Farmland	0.4858	28.7098	70.8044
10-20cm	Shrubland	33.2808	43.6314	23.0878
10-20cm	Shrubland	45.7494	37.4974	16.7532
10-20cm	Shrubland	47.9886	35.24	16.7714
10-20cm	Woodland	24.3478	45.753	29.8992
10-20cm	Woodland	20.2966	43.6472	36.0562
10-20cm	Woodland	23.7856	45.444	30.7704
20-30cm	Garden plot	11.8704	60.4308	27.6988
20-30cm	Garden plot	11.3288	63.3508	25.3204
20-30cm	Garden plot	12.2702	59.6398	28.09
20-30cm	Grassland	27.228	45.7808	26.9912
20-30cm	Grassland	26.656	55.5344	17.8096
20-30cm	Grassland	24.8964	43.2498	31.8538
20-30cm	Farmland	1.3512	22.4976	76.1512
20-30cm	Farmland	0.6316	23.3616	76.0068
20-30cm	Farmland	1.0074	30.1534	68.6692
20-30cm	Shrubland	31.9284	44.082	23.9896
20-30cm	Shrubland	25.8342	49.636	24.5298
20-30cm	Shrubland	21.2382	49.0392	30.0226
20-30cm	Woodland	15.8752	51.1102	33.0146
20-30cm	Woodland	18.533	53.3542	28.1128
20-30cm	Woodland	24.1008	37.6702	38.229
30-40cm	Garden plot	21.6552	60.2246	18.1202
30-40cm	Garden plot	17.322	58.052	24.626
30-40cm	Garden plot	18.4318	54.8408	26.7274
30-40cm	Grassland	20.4984	58.7092	20.7924
30-40cm	Grassland	21.7268	54.7522	23.521
30-40cm	Grassland	16.7854	50.5168	32.6978
30-40cm	Farmland	5.0502	42.728	52.2218
30-40cm	Farmland	7.6742	31.3586	60.9672
30-40cm	Farmland	13.14	54.44	32.42
30-40cm	Shrubland	11.939	64.497	23.564
30-40cm	Shrubland	6.756	65.266	27.978
30-40cm	Shrubland	10.78	61.4106	27.8094
30-40cm	Woodland	12.6546	55.4086	31.9368
30-40cm	Woodland	14.5684	53.5298	31.9018
30-40cm	Woodland	21.9208	50.4502	27.629
0-40cm	Garden plot	19.9112	52.1375	27.9513
0-40cm	Garden plot	21.1638	50.7148	28.1214
0-40cm	Garden plot	17.483	51.2445	31.2725
0-40cm	Grassland	32.4289	45.1347	22.4364
0-40cm	Grassland	26.893	50.5514	22.5556
0-40cm	Grassland	26.5689	44.9244	28.5067
0-40cm	Farmland	2.15908	29.2416	68.5993
0-40cm	Farmland	2.50108	22.2044	75.2945
0-40cm	Farmland	3.69788	34.9028	61.3653
0-40cm	Shrubland	27.4944	45.8954	26.6102
0-40cm	Shrubland	30.7131	47.0843	22.2026
0-40cm	Shrubland	27.0428	46.9162	26.101
0-40cm	Woodland	22.2113	49.203	28.5857
0-40cm	Woodland	21.6042	50.1542	28.2416
0-40cm	Woodland	24.4613	44.9839	30.5548

## Sheet: Soil organic carbon content
		>2mm	2-0.25mm	<0.25mm
soil layer/cm	Vegetation restoration types	SOC/g.kg-1	SOC/g.kg-1	SOC/g.kg-1
0-5	Garden plot	34.1662	38.4794	44.8794
0-5	Garden plot	39.0712	37.2285	48.64
0-5	Garden plot	27.6587	34.0786	37.9597
0-5	Grassland	43.4103	53.3014	54.4016
0-5	Grassland	42.3333	54.3925	55.675
0-5	Grassland	38.6022	42.9341	51.1217
0-5	Farmland	21.745	19.5058	21.0774
0-5	Farmland	21.807	29.6131	19.5422
0-5	Farmland	20.7931	31.7174	19.7729
0-5	Shrubland	58.8913	72.8254	76.3009
0-5	Shrubland	57.8328	54.6096	63.5589
0-5	Shrubland	39.2949	65.1031	59.332
0-5	Woodland	34.7213	48.1907	36.6064
0-5	Woodland	50.4751	62.3409	67.4236
0-5	Woodland	35.4392	42.2512	34.1718
5-10	Garden plot	29.3449	35.2187	34.277
5-10	Garden plot	34.9737	35.9842	30.3913
5-10	Garden plot	30.8184	30.5319	34.0142
5-10	Grassland	44.3215	46.1562	49.5153
5-10	Grassland	45.0953	46.7728	42.5367
5-10	Grassland	37.3795	42.5477	48.4219
5-10	Farmland	21.4346	25.9729	20.1269
5-10	Farmland	18.2135	20.1801	18.9599
5-10	Farmland	23.4101	34.4719	22.2104
5-10	Shrubland	53.7227	62.4015	46.7791
5-10	Shrubland	36.6583	42.1359	45.0985
5-10	Shrubland	28.3596	41.0217	35.0376
5-10	Woodland	37.2992	32.5034	27.8437
5-10	Woodland	38.0123	45.1976	43.738
5-10	Woodland	30.3829	33.9035	28.8513
10-20	Garden plot	24.5008	30.326	26.4957
10-20	Garden plot	36.2038	32.7752	34.4108
10-20	Garden plot	30.4974	30.2304	32.4774
10-20	Grassland	28.7101	42.2755	40.7716
10-20	Grassland	35.2729	39.3187	39.1513
10-20	Grassland	27.7945	32.6364	37.1505
10-20	Farmland	12.0389	16.7855	10.3906
10-20	Farmland	15.5761	23.9175	15.3043
10-20	Farmland	22.0342	29.2896	20.5155
10-20	Shrubland	29.0898	54.5837	45.39
10-20	Shrubland	23.8074	35.0892	31.7431
10-20	Shrubland	19.5092	23.0762	20.4457
10-20	Woodland	14.2016	22.6087	20.6469
10-20	Woodland	35.078	40.1109	37.6681
10-20	Woodland	28.5445	29.1627	25.9325
20-30	Garden plot	20.0688	24.3274	26.1281
20-30	Garden plot	15.7028	10.8226	23.8488
20-30	Garden plot	25.3283	26.3528	29.1613
20-30	Grassland	17.2461	23.5615	28.7097
20-30	Grassland	21.2136	24.6351	29.1088
20-30	Grassland	17.4835	20.616	29.3892
20-30	Farmland	9.2559	13.1207	8.40875
20-30	Farmland	8.53824	14.4494	9.20158
20-30	Farmland	10.6165	20.0804	15.8834
20-30	Shrubland	18.1408	25.2393	28.1581
20-30	Shrubland	17.8102	24.3516	23.2195
20-30	Shrubland	6.51003	11.855	6.06823
20-30	Woodland	13.0114	15.9198	15.0285
20-30	Woodland	20.4463	23.6845	27.0663
20-30	Woodland	20.7776	25.3996	25.771
30-40	Garden plot	18.8306	19.9541	20.9075
30-40	Garden plot	10.2383	19.8722	15.0493
30-40	Garden plot	18.649	21.1662	23.3671
30-40	Grassland	13.9643	18.9476	24.3872
30-40	Grassland	17.0578	19.425	21.7314
30-40	Grassland	12.3391	34.7172	18.7769
30-40	Farmland	8.29088	14.4393	7.25894
30-40	Farmland	8.19579	12.7195	7.51922
30-40	Farmland	16.2674	21.7298	17.5087
30-40	Shrubland	16.4894	24.4783	28.5546
30-40	Shrubland	17.2437	22.635	26.016
30-40	Shrubland	5.31785	10.1088	5.05939
30-40	Woodland	10.498	14.16	12.2455
30-40	Woodland	15.4158	23.7256	26.3509
30-40	Woodland	19.0036	21.1959	24.655
0-40	Garden plot	25.3822	29.6611	30.5375
0-40	Garden plot	27.2379	27.3365	30.468
0-40	Garden plot	26.5904	28.472	31.3959
0-40	Grassland	29.5304	36.8484	39.5571
0-40	Grassland	32.1946	36.9088	37.6406
0-40	Grassland	26.7197	34.6903	36.972
0-40	Farmland	14.553	17.9648	13.4525
0-40	Farmland	14.4661	20.1759	14.1055
0-40	Farmland	18.6243	27.4578	19.1782
0-40	Shrubland	35.2668	47.9056	45.0365
0-40	Shrubland	30.6705	35.7643	37.9272
0-40	Shrubland	19.7983	30.233	25.1886
0-40	Woodland	21.9463	26.6765	22.4742
0-40	Woodland	31.8855	39.0119	40.4494
0-40	Woodland	26.8296	30.3826	27.8763

## Sheet:  physicochemical property 
Vegetation restoration types	Soil layer/cm	BD(g/cm3)	pH	SOC(g/kg)	AN(mg/kg)	TP(g/kg)	AP(mg/kg)	TK(g/kg)	AK(mg/kg)
Garden plot	0-5	1.12042	6.58	38.3284	201.32	0.15835	1.95885	12.7702	194
Garden plot	10-20	1.19438	6.52	28.4151	151.48	0.150139		12.7202	71
Garden plot	20-30	1.10789	6.66	23.8982	155.68	0.143298	0.827902	12.6214	59
Garden plot	30-40	1.13804	6.74	20.6288	307.16	0.110067	0.59046	11.8869	49
Garden plot	5-10	1.13361	6.55	34.2865	164.22	0.153304	0.88275	12.5996	99
Garden plot	0-5	1.14011	6.2	44.6497	280.56	0.238879	7.55119	13.4756	131
Garden plot	10-20	1.204	6.69	33.2151	190.82	0.219049	3.71066	12.0338	85
Garden plot	20-30	1.18628	6.84	18.8042	132.16	0.121082	0.661638	12.0964	76
Garden plot	30-40	1.17234	6.12	13.5564	78.12	0.0876018	0.371128	11.711	69
Garden plot	5-10	1.11524	6.33	37.2999	206.08	0.22848		12.8336	103.792
Garden plot	0-5	1.03364	6.9	35.0661	155.12	0.217705	6.43001	13.9902	231
Garden plot	10-20	1.16555		32.0795	176.96	0.131803	3.36051	11.7583	80
Garden plot	20-30	1.07265	6.8	28.2087	166.88	0.131464	0.5	13.273	62
Garden plot	30-40	1.07566	6.82	8.40536	148.12	0.0956482	0.501714	11.7896	71
Garden plot	5-10	1.17111	6.71	30.3596	178.78	0.171904	3.3545	12.9515	120.758
Grassland	0-5	1.07529	5.92	49.5067	299.32	0.193399	1.02489	12.3752	107.784
Grassland	10-20	1.07915	6.47	38.351	241.08	0.151452	0.800755	11.7101	69
Grassland	20-30	1.12504	6.87	20.6025	134.82	0.107429	0.4	12.3487	61
Grassland	30-40	1.02902	6.74	15.7377	115.5	0.0959928	0.21508	12.2558	69
Grassland	5-10	0.986809	5.97	44.7576	290.22	0.199472	1.02158	12.1291	82
Grassland	0-5	0.996419	6.35	53.6294	294.42	0.207278	0.883286	13.2086	83.8323
Grassland	10-20	1.09658	6.72	45.8139	260.96	0.184475	0.662584	13.3842	61
Grassland	20-30	1.15519	6.91	20.3016	155.82	0.122594	0.357006	12.8014	52.8942
Grassland	30-40	1.11712	6.71	18.2002	121.38	0.103823	0.284055	12.2059	61.8762
Grassland	5-10	0.97814	6.4	45.6994	288.82	0.196552	0.881844	14.0572	66
Grassland	0-5	1.04966	7.1	46.0078	217.98	0.240917	9.16817	14.2989	178.643
Grassland	10-20	1.14002	7.22	30.1265	176.82	0.203883	3.96841	13.7039	72.8543
Grassland	20-30	1.17931	6.94	18.5615	134.4	0.112845	0.669545	14.2771	60
Grassland	30-40	1.2137	6.97	13.104	66.78	0.104526	0.436213	14.7885	61.8762
Grassland	5-10	0.90408	7.12	41.8296	239.96	0.232222	5.32333	14.7335	146
Farmland	0-5	1.1892	5.09	24.1112	114.52	0.151212	6.35311	10.8522	82
Farmland	10-20	1.39028	5.15	14.538	71.4	0.107348	3.08525	10.186	30
Farmland	20-30	1.20089	5.47	9.8498	54.18	0.0777798	0.937702	10.5234	52
Farmland	30-40	1.15698	5.87	9.32344	52.5	0.0835585	0.801162	11.4974	56.8862
Farmland	5-10	1.24385	5.13	21.3888	150.5	0.147169	6.12425	10.7262	46.9062
Farmland	0-5	1.15208	5.21	23.0179	155.26	0.137873	3.57788	10.6705	74.8503
Farmland	10-20	1.34561	5.32	21.7438	123.62	0.13218	2.94866	10.2023	42
Farmland	20-30	1.42618	5.79	10.4497	65.8	0.0846444	0.558878	10.8238	54
Farmland	30-40	1.22849	5.67	11.4936	35.7	0.0821739	0.435324	13.6721	63
Farmland	5-10	1.37284	5.03	15.2323	142.38	0.136198	3.41988	9.9985	52
Farmland	0-5	1.29398	4.88	19.8949	159.6	0.148335	2.48434	10.2017	56
Farmland	10-20	1.36615	5.18	21.6308	154	0.135674	2.34753	10.3113	58.8822
Farmland	20-30	1.35532	6.75	14.7233	106.82	0.117552	0.638748	13.2939	64
Farmland	30-40	1.03628	6.64	18.6438	123.62	0.15015	0.866109	16.5063	72
Farmland	5-10	1.1631	5.12	21.37	165.62	0.140713	2.92158	9.70474	62
Shrubland	0-5	0.886648	6.76	52.3318	443.38	0.190069	2.85311	13.645	136
Shrubland	10-20	0.982945	7.03	39.8512	229.46	0.164809	1.59187	12.9296	72
Shrubland	20-30	1.15434	7.12	23.2474	125.58	0.116834	0.41	12.5778	69.8603
Shrubland	30-40	1.14228	7.48	17.8813	112.14	0.111325	0.136301	13.1755	72
Shrubland	5-10	1.04099	6.98	58.3851	306.04	0.184409	2.12949	13.5837	96
Shrubland	0-5	0.809573	6.12	60.2146	309.54	0.127356	1.25227	12.6235	95
Shrubland	10-20	1.13719	6.7	28.537	169.12	0.115229	0.647743	11.5401	57
Shrubland	20-30	1.02478	7.19	23.5192	172.34	0.112153	0.446753	11.8567	67
Shrubland	30-40	0.961462	7.43	19.243	111.16	0.112819	0.142053	12.386	75
Shrubland	5-10	1.07745	6.36	0	275.52	0.104135	0.728987	11.8549	68
Shrubland	0-5	1.10497	7.04	52.0328	318.08	0.147304	2.54713	10.0038	94
Shrubland	10-20	1.38151	7.42	24.7331	137.76	0.0925178	0.492074	8.62652	34
Shrubland	20-30	1.44973	7.49	8.19664	42.98	0.0620551	0.32	7.70331	27
Shrubland	30-40	1.46952	7.6	6.70149	43.96	0.0539267	0.256805	8.97595	27.9441
Shrubland	5-10	1.19212	7.29	36.007	196.56	0.117575	1.22641	9.8608	60.8782
Woodland	0-5	1.1566	6.2	31.1718	270.48	0.145055	2.16174	19.1035	242.515
Woodland	10-20	1.25827	6.18	17.4117	182.42	0.1162	0.927596	17.1551	91.8164
Woodland	20-30	1.23565	6.21	12.4549	121.66	0.112873	1.00763	16.3481	85
Woodland	30-40	1.13436	6.2	10.7566	111.02	0.107225	0.568558	17.1593	94.8104
Woodland	5-10	1.24781	6.25	23.2044	200.2	0.130676	1.57809	18.1003	123.752
Woodland	0-5	1.08593	6.95	49.1293	352.52	0.232174	5.18608	21.2292	290
Woodland	10-20	1.16791	7.09	35.7481	299.32	0.165225	1.7976	21.1989	134
Woodland	20-30	1.04918	7.95	21.1043	204.12	0.118106	0.510433	18.8742	114
Woodland	30-40	1.11024	7.89	14.3956	150.78	0.111659	0.56	18.8612	120
Woodland	5-10	1.08424	6.99	44.3526	311.08	0.190935	2.45046	21.4107	182.635
Woodland	0-5	1.44493	6.64	37.1086	246.82	0.194647	5.89966	13.274	167.665
Woodland	10-20	1.29181	6.75	26.3332	203.98	0.214929	3.12223	12.6202	72.8543
Woodland	20-30	1.28776	6.9	23.8645	158.9	0.157588	1.36645	11.9407	59.8802
Woodland	30-40	1.24498	6.62	19.5852		0.0899956	0.783806	11.3799	43.9122
Woodland	5-10	1.16028	6.61	29.8797	238.42	0.237919	5.82163	13.0597	101.796
